# Supplementary material
Source: PubMed Central journal article supplement (PMC5890809)
Supplement: NIHMS901479-supplement-supplement_1.pdf [file NIHMS901479-supplement-supplement_1.pdf]

Online Figure 1. Timeline for measuring patient characteristics, adherence and mortality.

Online Table 1. Baseline characteristics of the study cohort stratified by adherence to the three classes of preventive therapies.

Online Table 2. Hazard ratios (95% confidence intervals) of all-cause mortality by adherence category in the whole study cohort and various subgroup stratified by presence heart failure, diabetes and dementia, and age and sex.

Online Table 3. Sensitivity analysis by additionally controlling for polypharmacy and medication dose

Online Table 4. Proportional hazard assumption test (Pearson correlation test of Schoenfeld residuals with time)

**Online Figure 1.** Timeline for measuring patient characteristics, adherence and mortality.  
AMI = acute myocardial infarction.

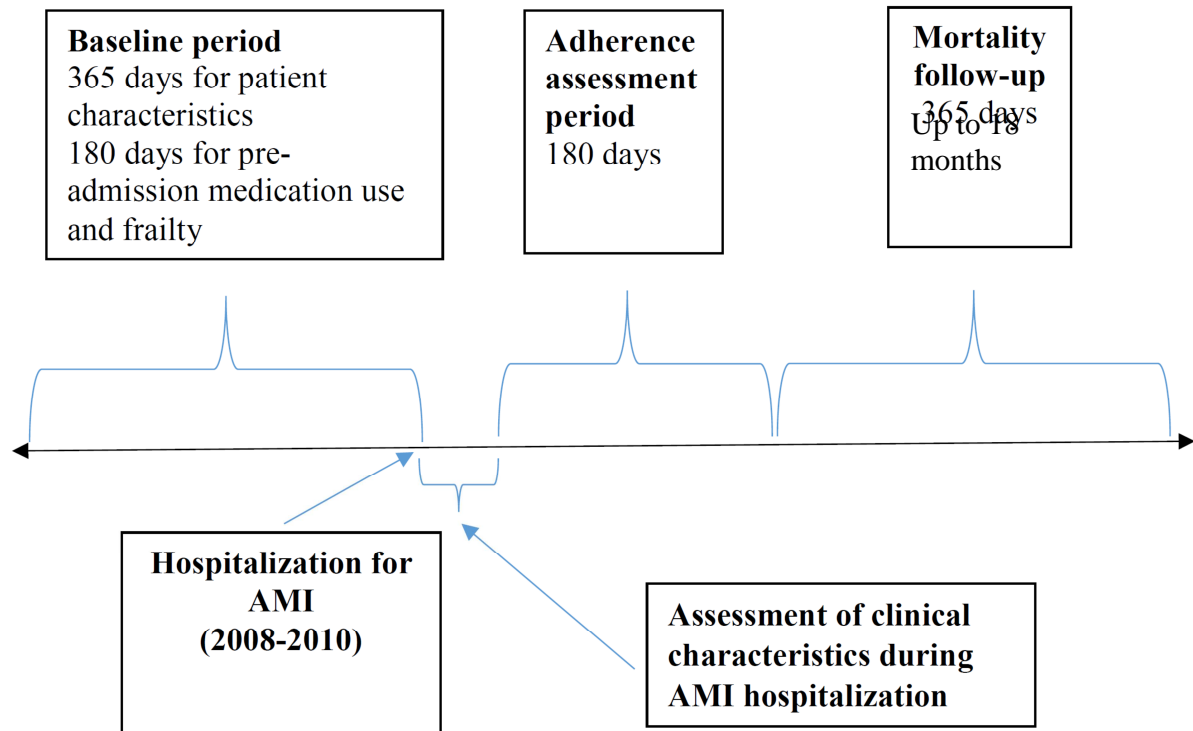

Online Figure 2.

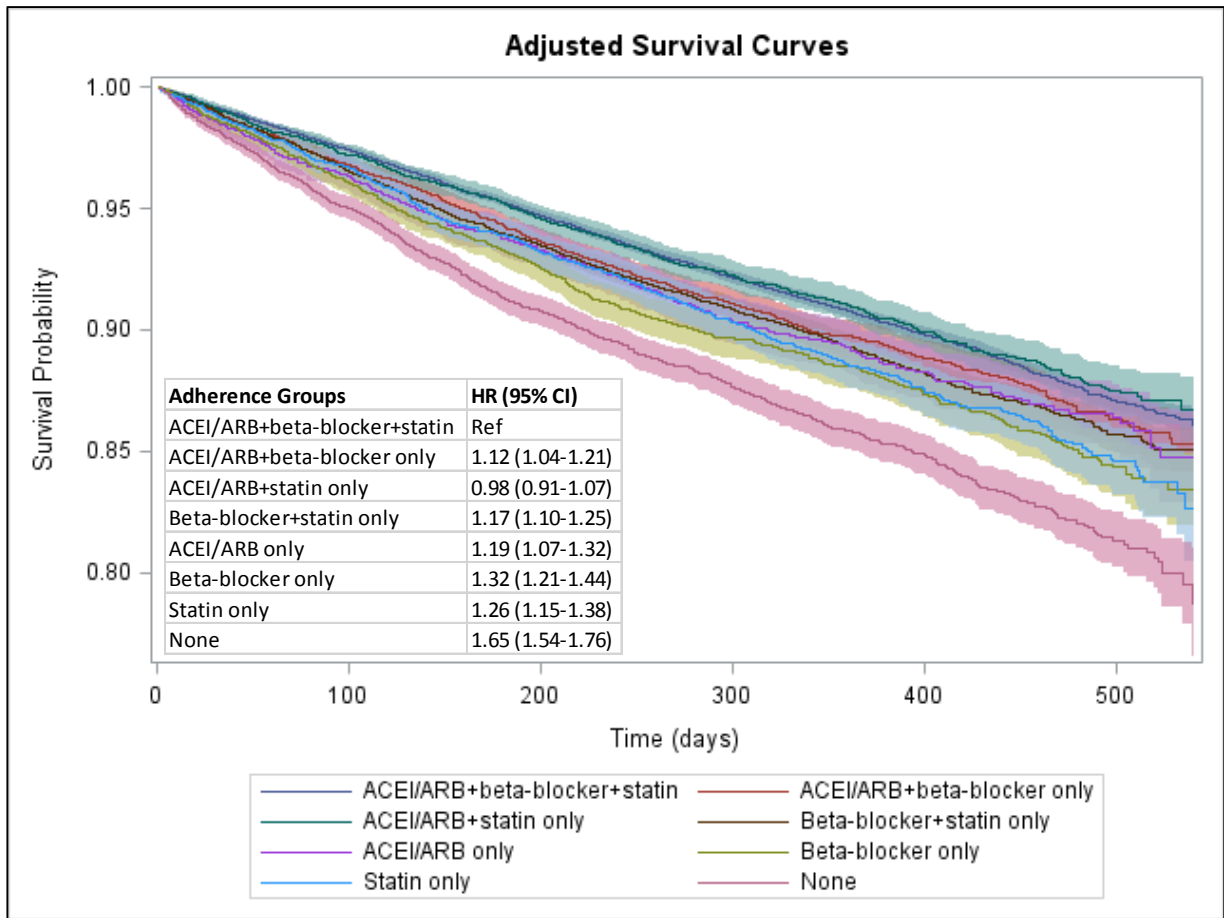

Online Table 1. Baseline characteristics of the study cohort stratified by adherence to the three classes of preventive therapies

|                                                                             | Cohort       | Adherent to         |                              |                        |                            |               |                   |              |              |
|-----------------------------------------------------------------------------|--------------|---------------------|------------------------------|------------------------|----------------------------|---------------|-------------------|--------------|--------------|
|                                                                             |              | All three therapies | ACEI/ARB + beta-blocker only | ACEI/ARB + statin only | Beta-blocker + statin only | ACEI/ARB only | Beta-blocker only | Statin only  | None         |
| N (%)                                                                       | 90869 (100%) | 44051 (48.5%)       | 8269 (9.1%)                  | 7242 (8.0%)            | 12401 (13.6%)              | 3396 (3.7%)   | 4559 (5.0%)       | 4304 (4.7%)  | 6647 (7.3%)  |
| <i>Socio-demographics</i>                                                   |              |                     |                              |                        |                            |               |                   |              |              |
| Age, mean (SD)                                                              | 76.77 (7.24) | 76.59 (7.20)        | 76.81 (7.23)                 | 76.94 (7.18)           | 77.07 (7.25)               | 76.89 (7.40)  | 77.11 (7.28)      | 76.72 (7.19) | 76.91 (7.49) |
| 65-74                                                                       | 39572 (43.6) | 19961 (44.6)        | 3582 (43.3)                  | 3078 (43.1)            | 5105 (41.2)                | 1464 (43.1)   | 1907 (41.8)       | 1870 (43.5)  | 2905 (43.7)  |
| 75-84                                                                       | 36093 (39.7) | 17279 (39.2)        | 3313 (40.1)                  | 2907 (43.7)            | 5120 (41.3)                | 1348 (39.7)   | 1838 (40.3)       | 1738 (40.4)  | 2550 (38.4)  |
| 85+                                                                         | 15204 (16.7) | 7111 (16.1)         | 1374 (17.6)                  | 1257 (17.2)            | 2176 (17.6)                | 584 (17.2)    | 814 (17.9)        | 696 (16.2)   | 1192 (17.9)  |
| Gender (Male)                                                               | 41092 (45.2) | 20005 (45.4)        | 3380 (40.9)                  | 3292 (45.5)            | 5691 (45.9)                | 1407 (41.4)   | 1961 (43.0)       | 2215 (51.5)  | 3141 (47.3)  |
| <i>Race</i>                                                                 |              |                     |                              |                        |                            |               |                   |              |              |
| White                                                                       | 77243 (85.0) | 37923 (86.1)        | 6987 (84.5)                  | 6143 (84.8)            | 10795 (87.1)               | 2717 (80.0)   | 3878 (85.1)       | 3709 (86.2)  | 5091 (76.6)  |
| Black                                                                       | 7253 (8.0)   | 3131 (7.1)          | 716 (8.66)                   | 570 (7.9)              | 822 (6.6)                  | 388 (11.4)    | 396 (8.7)         | 302 (7.0)    | 928 (14.0)   |
| Hispanic                                                                    | 2644 (2.9)   | 1172 (2.7)          | 264 (3.2)                    | 245 (3.2)              | 297 (2.4)                  | 146 (4.3)     | 133 (2.9)         | 108 (2.5)    | 289 (4.4)    |
| Asian                                                                       | 1985 (2.2)   | 985 (2.2)           | 144 (1.7)                    | 153 (2.1)              | 288 (2.3)                  | 81 (2.4)      | 69 (1.5)          | 104 (2.4)    | 161 (2.4)    |
| Other                                                                       | 1744 (1.9)   | 840 (1.9)           | 158 (1.9)                    | 141 (2.0)              | 199 (1.6)                  | 64 (1.9)      | 83 (1.8)          | 81 (1.9)     | 178 (2.7)    |
| <i>Median household income at US Census block groups of residence</i>       |              |                     |                              |                        |                            |               |                   |              |              |
| ≤\$30000                                                                    | 42846 (47.2) | 20663 (46.9)        | 3945 (47.7)                  | 3362 (46.4)            | 5655 (45.6)                | 1744 (51.4)   | 2099 (46.0)       | 1913 (44.5)  | 3465 (52.1)  |
| \$30001-\$60000                                                             | 37639 (41.4) | 18383 (41.7)        | 3405 (41.2)                  | 3060 (42.3)            | 5263 (42.4)                | 1286 (37.9)   | 1919 (42.1)       | 1829 (42.5)  | 2494 (37.5)  |
| \$60001-\$100000                                                            | 8388 (9.2)   | 4042 (9.2)          | 752 (9.09)                   | 656 (9.06)             | 1207 (9.73)                | 283 (8.33)    | 452 (9.91)        | 446 (10.4)   | 550 (8.3)    |
| \$100001-\$150000                                                           | 1542 (1.7)   | 753 (1.7)           | 135 (1.6)                    | 120 (1.7)              | 200 (1.6)                  | 66 (1.9)      | 70 (1.5)          | 86 (2.0)     | 112 (1.7)    |
| ≥\$150001                                                                   | 454 (0.5)    | 210 (0.5)           | 32 (0.4)                     | 44 (0.6)               | 76 (0.6)                   | 17 (0.5)      | 19 (0.4)          | 30 (0.7)     | 26 (0.4)     |
| Part D prescription drug benefit gap (“doughnut hole”)                      | 11570 (12.7) | 5928 (13.5)         | 996 (12.0)                   | 950 (13.1)             | 1655 (13.4)                | 393 (11.6)    | 514 (11.3)        | 515 (12.0)   | 619 (9.31)   |
| Medicare & Medicaid dual eligibility                                        | 21368 (23.5) | 10760 (24.4)        | 1777 (21.5)                  | 1635 (22.6)            | 2623 (21.2)                | 871 (25.7)    | 903 (19.8)        | 831 (19.3)   | 1968 (29.6)  |
| <i>Clinical characteristics (within 12 months prior to index admission)</i> |              |                     |                              |                        |                            |               |                   |              |              |
| AMI                                                                         | 2533 (2.8)   | 1173 (2.7)          | 247 (3.0)                    | 188 (2.6)              | 342 (2.8)                  | 84 (2.5)      | 163 (3.6)         | 130 (3.0)    | 206 (3.1)    |
| CABG                                                                        | 656 (0.7)    | 302 (0.7)           | 49 (0.6)                     | 56 (0.8)               | 114 (0.9)                  | 21 (0.6)      | 34 (0.8)          | 40 (0.9)     | 40 (0.6)     |
| PCI                                                                         | 4340 (4.8)   | 2091 (4.8)          | 393 (4.8)                    | 348 (4.8)              | 586 (4.7)                  | 161 (4.7)     | 258 (5.7)         | 198 (4.6)    | 305 (4.6)    |
| Stroke/TIA                                                                  | 5475 (6.0)   | 2466 (5.6)          | 488 (5.9)                    | 463 (6.4)              | 757 (6.1)                  | 211 (6.2)     | 334 (7.3)         | 281 (6.5)    | 475 (7.2)    |
| Unstable Angina                                                             | 3486 (3.8)   | 1642 (3.7)          | 311 (3.8)                    | 282 (3.9)              | 521 (4.2)                  | 151 (4.5)     | 192 (4.2)         | 152 (3.5)    | 235 (3.5)    |
| Angina Pectoris                                                             | 5656 (6.2)   | 2724 (6.2)          | 500 (6.1)                    | 469 (6.5)              | 811 (6.5)                  | 213 (6.3)     | 329 (7.2)         | 252 (5.9)    | 358 (5.4)    |
| IHD                                                                         | 39965 (44.0) | 18950 (43.0)        | 3739 (45.2)                  | 3241 (44.8)            | 5632 (45.4)                | 1477 (43.5)   | 2185 (47.9)       | 1884 (43.8)  | 2857 (43.0)  |
| CHF                                                                         | 18819 (20.7) | 8701 (19.8)         | 1794 (21.7)                  | 1422 (19.6)            | 2786 (22.5)                | 726 (21.4)    | 1039 (22.8)       | 838 (19.5)   | 1513 (22.8)  |
| Atrial Fibrillation                                                         | 8797 (9.7)   | 4100 (9.3)          | 856 (10.4)                   | 714 (9.9)              | 1348 (10.9)                | 316 (9.3)     | 497 (10.9)        | 428 (9.9)    | 539 (8.1)    |
| Hypertension                                                                | 68669 (75.6) | 33113 (75.2)        | 6465 (78.2)                  | 5556 (76.7)            | 9504 (76.6)                | 2646 (77.9)   | 3588 (78.7)       | 3073 (71.4)  | 4724 (71.1)  |
| PVD                                                                         | 15682 (17.3) | 7289 (16.6)         | 1456 (17.6)                  | 1251 (17.3)            | 2301 (18.6)                | 569 (16.8)    | 890 (19.5)        | 745 (17.3)   | 1181 (17.8)  |
| Hyperlipidemia                                                              | 53836 (59.3) | 26203 (59.5)        | 4964 (60.0)                  | 4356 (60.2)            | 7621 (61.5)                | 1915 (56.4)   | 2767 (60.7)       | 2604 (60.5)  | 3406 (51.2)  |
| Diabetes                                                                    | 36337 (40.0) | 17600 (40.0)        | 3369 (40.7)                  | 2881 (39.8)            | 5000 (40.3)                | 1393 (41.0)   | 1913 (42.0)       | 1633 (38.0)  | 2548 (38.3)  |
| CKD                                                                         | 10343 (11.4) | 4483 (10.2)         | 867 (10.5)                   | 753 (10.4)             | 1878 (15.1)                | 358 (10.6)    | 678 (14.8)        | 539 (12.5)   | 787 (11.9)   |
| COPD                                                                        | 19312 (21.3) | 8716 (19.8)         | 1791 (21.7)                  | 1582 (21.8)            | 2786 (22.5)                | 799 (23.5)    | 966 (21.2)        | 1028 (23.9)  | 1643 (24.7)  |
| Asthma                                                                      | 4645 (5.1)   | 2044 (4.6)          | 429 (5.2)                    | 390 (5.4)              | 681 (5.49)                 | 218 (6.4)     | 227 (5.0)         | 247 (5.7)    | 409 (6.2)    |
| Liver Disease                                                               | 1383 (1.5)   | 667 (1.5)           | 147 (1.8)                    | 79 (1.1)               | 175 (1.4)                  | 65 (1.9)      | 73 (1.60)         | 64 (1.49)    | 116 (1.8)    |
| Cancer                                                                      | 9417 (10.4)  | 4353 (9.9)          | 892 (10.8)                   | 754 (10.4)             | 1383 (11.2)                | 332 (9.8)     | 553 (12.1)        | 501 (11.6)   | 649 (9.8)    |

Continued

**Online Table 1. Continued**

|                                                                                             | Cohort        | Adherent to         |                              |                        |                            |               |                   |             |             |
|---------------------------------------------------------------------------------------------|---------------|---------------------|------------------------------|------------------------|----------------------------|---------------|-------------------|-------------|-------------|
|                                                                                             |               | All three therapies | ACEI/ARB + beta-blocker only | ACEI/ARB + statin only | Beta-blocker + statin only | ACEI/ARB only | Beta-blocker only | Statin only | None        |
| Depression                                                                                  | 11,825 (13.0) | 5334 (12.1)         | 1080 (13.1)                  | 963 (13.3)             | 1666 (13.7)                | 482 (14.2)    | 667 (14.6)        | 625 (14.5)  | 1018 (15.3) |
| Dementia*                                                                                   | 8666 (9.5)    | 3155 (7.2)          | 575 (7.0)                    | 606 (8.4)              | 910 (7.4)                  | 329 (9.8)     | 395 (8.7)         | 370 (8.7)   | 773 (11.8)  |
| Charlson Comorbidity Index                                                                  |               |                     |                              |                        |                            |               |                   |             |             |
| 0                                                                                           | 27913 (30.7)  | 14177 (32.2)        | 2459 (29.7)                  | 2200 (30.4)            | 3566 (28.8)                | 984 (29.0)    | 1229 (27.0)       | 1307 (30.4) | 1991 (30.0) |
| 1-2                                                                                         | 36199 (39.8)  | 17659 (40.1)        | 3333 (40.3)                  | 2956 (40.8)            | 4777 (38.5)                | 1406 (41.4)   | 1789 (39.2)       | 1678 (39.0) | 2601 (39.1) |
| 3-5                                                                                         | 21249 (23.4)  | 9794 (22.2)         | 2010 (24.3)                  | 1686 (23.3)            | 3138 (25.3)                | 817 (24.1)    | 1161 (25.5)       | 1028 (23.9) | 1615 (24.3) |
| 6-8                                                                                         | 4545 (5.0)    | 2006 (4.6)          | 386 (4.7)                    | 327 (4.5)              | 777 (6.3)                  | 149 (4.4)     | 307 (6.7)         | 232 (5.4)   | 361 (5.4)   |
| 9+                                                                                          | 963 (1.1)     | 415 (0.9)           | 81 (1.0)                     | 73 (1.0)               | 143 (1.2)                  | 40 (1.2)      | 73 (1.6)          | 59 (1.4)    | 79 (1.2)    |
| <i>Pre-admission medication use (within 180 days prior to index admission)</i>              |               |                     |                              |                        |                            |               |                   |             |             |
| ACEI/ARB                                                                                    | 63 170 (69.5) | 31 167 (70.8)       | 6078 (73.5)                  | 5283 (73.0)            | 8572 (69.1)                | 2509 (73.9)   | 3040 (66.7)       | 2605 (60.5) | 3916 (58.9) |
| Beta-blocker                                                                                | 51 453 (56.6) | 25899 (58.8)        | 5091 (61.6)                  | 3699 (51.1)            | 7222 (58.2)                | 1641 (48.3)   | 2867 (62.9)       | 2090 (48.6) | 2944 (44.3) |
| Statin                                                                                      | 55 636 (61.2) | 23038 (63.7)        | 4586 (55.5)                  | 4850 (67.0)            | 8004 (64.5)                | 1767 (52.0)   | 2476 (54.3)       | 2748 (63.9) | 3167 (47.7) |
| <i>Pre-admission variables for frailty proxy (within 180 days prior to index admission)</i> |               |                     |                              |                        |                            |               |                   |             |             |
| Ambulance Transport                                                                         | 23875 (26.3)  | 11092 (25.2)        | 2190 (26.5)                  | 1847 (25.5)            | 3220 (26.0)                | 938 (27.6)    | 1319 (28.9)       | 1186 (27.6) | 2083 (31.3) |
| Coagulation Deficiency                                                                      | 4052 (4.5)    | 1849 (4.2)          | 398 (4.8)                    | 286 (4.0)              | 610 (4.9)                  | 152 (4.5)     | 222 (4.9)         | 213 (5.0)   | 322 (4.8)   |
| Decubitus Ulcer                                                                             | 4532 (5.0)    | 2069 (4.7)          | 440 (5.3)                    | 339 (4.7)              | 679 (5.5)                  | 168 (5.0)     | 256 (5.6)         | 203 (4.7)   | 378 (5.7)   |
| Falls/Difficulty Walking                                                                    | 13015 (14.3)  | 5960 (13.5)         | 1169 (14.1)                  | 1025 (14.2)            | 1830 (14.8)                | 550 (16.2)    | 748 (16.4)        | 630 (14.6)  | 1103 (16.6) |
| Obesity                                                                                     | 5953 (6.6)    | 2874 (6.5)          | 541 (6.5)                    | 490 (6.8)              | 808 (6.5)                  | 230 (6.8)     | 313 (6.9)         | 264 (6.1)   | 433 (6.5)   |
| Bladder Dysfunction                                                                         | 8234 (9.1)    | 3774 (8.6)          | 739 (8.9)                    | 673 (9.3)              | 1219 (9.8)                 | 301 (8.9)     | 468 (10.3)        | 422 (9.8)   | 638 (9.6)   |
| Infection/sepsis                                                                            | 12876 (14.2)  | 5919 (13.4)         | 1162 (14.1)                  | 1001 (13.8)            | 1868 (15.1)                | 500 (14.7)    | 740 (16.2)        | 642 (14.9)  | 1044 (15.7) |
| Lipid Abnormality                                                                           | 67108 (73.9)  | 32587 (74.0)        | 6172 (74.6)                  | 5489 (75.8)            | 9377 (75.6)                | 2408 (70.9)   | 3424 (75.1)       | 3255 (75.6) | 4396 (66.1) |
| Podiatric Care                                                                              | 17385 (19.1)  | 8552 (19.4)         | 1593 (19.3)                  | 1308 (18.1)            | 2478 (20.0)                | 613 (18.1)    | 921 (20.2)        | 740 (17.2)  | 1180 (17.8) |
| Neurological Disorder                                                                       | 10715 (11.8)  | 4782 (10.9)         | 952 (11.5)                   | 903 (12.5)             | 1460 (11.8)                | 446 (13.1)    | 620 (13.6)        | 553 (12.9)  | 999 (15.0)  |
| Osteoarthritis                                                                              | 27834 (30.6)  | 13335 (30.3)        | 2579 (31.2)                  | 2212 (30.5)            | 3842 (31.0)                | 1125 (33.1)   | 1441 (31.6)       | 1311 (30.5) | 1989 (29.9) |
| Paralysis                                                                                   | 2199 (2.4)    | 991 (2.3)           | 209 (2.5)                    | 182 (2.5)              | 266 (2.1)                  | 105 (3.1)     | 127 (2.8)         | 104 (2.4)   | 215 (3.2)   |
| Parkinson's Disease                                                                         | 1142 (1.3)    | 527 (1.2)           | 111 (1.3)                    | 93 (1.3)               | 164 (1.3)                  | 42 (1.2)      | 61 (1.3)          | 54 (1.3)    | 90 (1.4)    |
| Pulmonary Circulation Disorder                                                              | 4477 (4.9)    | 2039 (4.6)          | 461 (5.6)                    | 353 (4.9)              | 680 (5.5)                  | 172 (5.1)     | 237 (5.2)         | 226 (5.3)   | 309 (4.7)   |
| Rehabilitation Services                                                                     | 14444 (15.9)  | 6820 (15.5)         | 1359 (16.4)                  | 1146 (15.8)            | 2047 (16.5)                | 561 (16.5)    | 763 (16.7)        | 704 (16.4)  | 1044 (15.7) |
| Screening tests                                                                             | 71107 (78.3)  | 34708 (78.8)        | 6442 (77.9)                  | 5763 (79.6)            | 9956 (80.3)                | 2603 (76.7)   | 3594 (78.8)       | 3412 (79.3) | 4629 (69.6) |
| Vertigo                                                                                     | 13242(14.6)   | 5990 (13.6)         | 1245 (15.1)                  | 1089 (15.0)            | 1917 (15.5)                | 546 (16.1)    | 742 (16.3)        | 651 (15.1)  | 1062 (16.0) |
| Weakness                                                                                    | 2771 (3.0)    | 1216 (2.8)          | 247 (3.0)                    | 202 (2.8)              | 396 (3.2)                  | 121 (3.6)     | 164 (3.6)         | 156 (3.6)   | 269 (4.1)   |
| Wheelchair                                                                                  | 136 (0.1)     | 64 (0.2)            | 13 (0.2)                     | 11 (0.2)               | 17 (0.1)                   | 4 (0.1)       | 8 (0.2)           | 4 (0.1)     | 15 (0.2)    |
| Weight Loss                                                                                 | 4458 (4.9)    | 1975 (4.5)          | 443 (5.4)                    | 345 (4.8)              | 607 (4.9)                  | 172 (5.1)     | 266 (5.8)         | 236 (5.5)   | 414 (6.2)   |
| <i>Characteristics of index admission</i>                                                   |               |                     |                              |                        |                            |               |                   |             |             |
| NSTEMI                                                                                      | 65351 (71.9)  | 31159 (70.7)        | 6009 (72.7)                  | 5344 (73.8)            | 8983 (72.4)                | 2522 (74.3)   | 3364 (73.8)       | 3071 (71.4) | 4899 (73.7) |
| CHF                                                                                         | 32090 (35.3)  | 15275 (34.7)        | 2904 (35.1)                  | 2305 (31.8)            | 4759 (38.4)                | 1172 (34.5)   | 1713 (37.6)       | 1505 (35.0) | 2457 (37.0) |
| Cardiogenic Shock                                                                           | 2488 (2.7)    | 1192 (2.7)          | 197 (2.4)                    | 145 (2.0)              | 452 (3.6)                  | 77 (2.3)      | 126 (2.8)         | 145 (3.4)   | 154 (2.3)   |
| Cardiac Arrest                                                                              | 1062 (1.2)    | 544 (1.2)           | 89 (1.1)                     | 64 (0.9)               | 147 (1.2)                  | 26 (0.8)      | 66 (1.5)          | 67 (1.6)    | 59 (0.9)    |
| Acute Renal Failure                                                                         | 11037 (12.2)  | 4549 (10.3)         | 909 (11.0)                   | 776 (10.7)             | 2234 (18.0)                | 352 (10.4)    | 705 (15.5)        | 629 (14.6)  | 883 (13.3)  |
| Cardiac Dysrhythmias                                                                        | 27444 (30.2)  | 13177 (29.9)        | 2615 (31.6)                  | 2244 (31.0)            | 3867 (31.2)                | 996 (29.3)    | 1412 (31.0)       | 1321 (30.7) | 1812 (27.3) |
| Hypotension                                                                                 | 4510 (5.0)    | 2120 (4.8)          | 374 (4.5)                    | 367 (5.1)              | 694 (5.6)                  | 160 (4.7)     | 226 (5.0)         | 261 (6.1)   | 308 (4.6)   |
| Angiocardiology                                                                             | 61208 (67.4)  | 30340 (69.1)        | 5478 (66.3)                  | 4885 (67.5)            | 8221 (66.3)                | 2227 (65.6)   | 2927 (64.2)       | 2922 (67.9) | 4118 (62.0) |
| CABG                                                                                        | 7011 (7.7)    | 3099 (7.0)          | 555 (6.7)                    | 524 (7.2)              | 1363 (11.0)                | 220 (6.5)     | 393 (8.6)         | 432 (10.0)  | 425 (6.4)   |

Continued

**Online Table 1.** Continued

|                                                                               | Adherent to         |                     |                              |                        |                            |                     |                     |                     |                     |
|-------------------------------------------------------------------------------|---------------------|---------------------|------------------------------|------------------------|----------------------------|---------------------|---------------------|---------------------|---------------------|
|                                                                               | Cohort              | All three therapies | ACEI/ARB + beta-blocker only | ACEI/ARB + statin only | Beta-blocker + statin only | ACEI/ARB only       | Beta-blocker only   | Statin only         | None                |
| PCI                                                                           | 44137 (48.6)        | 22741 (51.6)        | 3887 (47.0)                  | 3502 (48.4)            | 5698 (46.0)                | 1576 (46.4)         | 1956 (42.9)         | 2014 (46.8)         | 2763 (41.6)         |
| Cardiac Catheterization                                                       | 61525 (67.7)        | 30529 (69.3)        | 5518 (66.7)                  | 4915 (67.9)            | 8274 (66.7)                | 2250 (66.3)         | 2971 (65.2)         | 2915 (67.7)         | 4153 (62.5)         |
| Thrombolytic Use for AMI                                                      | 615 (0.7)           | 306 (0.7)           | 66 (0.8)                     | 45 (0.6)               | 67 (0.5)                   | 26 (0.8)            | 29 (0.6)            | 29 (0.7)            | 47 (0.7)            |
| Antiplatelet Use for AMI                                                      | 4901 (5.4)          | 2445 (5.6)          | 440 (5.3)                    | 406 (5.6)              | 673 (5.4)                  | 164 (4.8)           | 221 (4.9)           | 227 (5.3)           | 325 (4.9)           |
| <i>Adherence (PDC) mean (IQR) (during 180 days after the index discharge)</i> |                     |                     |                              |                        |                            |                     |                     |                     |                     |
| ACEI/ARB                                                                      | 0.81<br>(0.68-1.00) | 0.97<br>(0.97-1.00) | 0.96<br>(0.93-1.00)          | 0.96<br>(0.93-1.00)    | 0.45<br>(0.24-0.66)        | 0.94<br>(0.88-1.00) | 0.46<br>(0.26-0.66) | 0.46<br>(0.26-0.66) | 0.45<br>(0.26-0.66) |
| Beta-blocker                                                                  | 0.86<br>(0.82-1.00) | 0.97<br>(0.97-1.00) | 0.96<br>(0.93-1.00)          | 0.53<br>(0.37-0.69)    | 0.97<br>(0.95-1.00)        | 0.53<br>(0.38-0.68) | 0.95<br>(0.90-1.00) | 0.52<br>(0.36-0.68) | 0.48<br>(0.33-0.66) |
| Statin                                                                        | 0.85<br>(0.79-1.00) | 0.97<br>(0.96-1.00) | 0.52<br>(0.34-0.78)          | 0.95<br>(0.92-1.00)    | 0.96<br>(0.93-1.00)        | 0.51<br>(0.33-0.68) | 0.51<br>(0.33-0.68) | 0.94<br>(0.89-1.00) | 0.46<br>(0.32-0.66) |
| <i>Number of outcome events</i>                                               | 9617 (10.6)         | 3995 (9.1)          | 884 (10.7)                   | 670 (9.3)              | 1448 (11.7)                | 381 (11.2)          | 618 (13.6)          | 530 (12.3)          | 1091 (16.4)         |
| <i>Follow-up mean days</i>                                                    | 347                 | 351                 | 347                          | 352                    | 344                        | 345                 | 344                 | 347                 | 335                 |

Note: Values are n (%) if not otherwise stated. \*Dementia/Alzheimer's Disease

ACEI/ARB = angiotensin converting enzyme inhibitors/angiotensin II receptor blocker; AMI = acute myocardial infarction; BB = beta-blocker; CABG = coronary artery bypass surgery; CHF = congestive heart failure; CKD = chronic kidney disease; COPD = chronic obstructive pulmonary disease; IHD = ischemic heart disease; IQR = interquartile range; NSTEMI = non-ST-elevation myocardial infarction; PDC = proportion of days covered; PCI = percutaneous coronary interventions; PVD = peripheral vascular disease; SD = standard deviation; TIA = transient ischemic attack.

Online Table 2. Hazard ratios (95% confidence intervals) of mortality by adherence to various combinations of preventive therapies in the whole study cohort and subgroups stratified by presence heart failure, dementia and diabetes, and age and sex.

|                                                                          | Adherence to      |                              |                        |                            |                  |                   |                  |                  |
|--------------------------------------------------------------------------|-------------------|------------------------------|------------------------|----------------------------|------------------|-------------------|------------------|------------------|
|                                                                          | All three classes | ACEI/ARB + beta-blocker only | ACEI/ARB + statin only | Beta-blocker + statin only | ACEI/ARB only    | Beta-blocker only | Statin only      | None             |
| <b>Whole study cohort (n=90,869)</b>                                     | (n=44,051)        | (n=8269)                     | (n=7242)               | (n=12 401)                 | (n=3396)         | (n=4559)          | (n=4304)         | (n=6647)         |
| Unadjusted                                                               | 1.00              | 1.19 (1.11-1.28)             | 1.02 (0.94-1.10)       | 1.31 (1.23-1.39)           | 1.26 (1.13-1.40) | 1.52 (1.40-1.68)  | 1.37 (1.25-1.50) | 1.89 (1.77-2.02) |
| Adjusted for age and gender                                              | 1.00              | 1.18 (1.10-1.27)             | 1.00 (0.92-1.08)       | 1.28 (1.20-1.35)           | 1.24 (1.12-1.38) | 1.48 (1.36-1.61)  | 1.35 (1.24-1.48) | 1.85 (1.73-1.98) |
| + race, income, state of residence, insurance status and comorbidities*  | 1.00              | 1.12 (1.04-1.21)             | 0.98 (0.90-1.07)       | 1.17 (1.10-1.24)           | 1.20 (1.08-1.33) | 1.32 (1.21-1.44)  | 1.25 (1.14-1.37) | 1.66 (1.55-1.78) |
| + frailty†                                                               | 1.00              | 1.12 (1.04-1.21)             | 0.98 (0.91-1.07)       | 1.17 (1.10-1.25)           | 1.19 (1.07-1.32) | 1.32 (1.21-1.44)  | 1.26 (1.15-1.38) | 1.65 (1.54-1.76) |
| <b>Patients with heart failure (n=38,357)</b>                            | (n=18,151)        | (n=3523)                     | (n=2809)               | (n=5662)                   | (n=1441)         | (n=2037)          | (n=1792)         | (n=2942)         |
| Unadjusted                                                               | 1.00              | 1.12 (1.03-1.23)             | 1.04 (0.94-1.15)       | 1.23 (1.15-1.33)           | 1.13 (0.99-1.30) | 1.41 (1.27-1.56)  | 1.36 (1.21-1.52) | 1.73 (1.59-1.88) |
| Adjusted for age and gender                                              | 1.00              | 1.13 (1.03-1.23)             | 1.03 (0.93-1.14)       | 1.21 (1.12-1.30)           | 1.14 (1.00-1.30) | 1.39 (1.25-1.54)  | 1.32 (1.18-1.48) | 1.71 (1.57-1.85) |
| + race, income, state of residence, insurance status and comorbidities*  | 1.00              | 1.09 (1.00-1.19)             | 0.99 (0.89-1.09)       | 1.15 (1.07-1.24)           | 1.11 (0.97-1.27) | 1.29 (1.16-1.43)  | 1.23 (1.10-1.38) | 1.62 (1.48-1.76) |
| + frailty†                                                               | 1.00              | 1.09 (0.99-1.19)             | 0.99 (0.89-1.09)       | 1.15 (1.07-1.24)           | 1.10 (0.96-1.26) | 1.29 (1.16-1.43)  | 1.23 (1.10-1.38) | 1.61 (1.47-1.75) |
| <b>Patients w/o heart failure (n=52,512)</b>                             | (n=25,900)        | (n=4746)                     | (n=4433)               | (n=6739)                   | (n=1955)         | (n=2522)          | (n=2512)         | (n=3705)         |
| Unadjusted                                                               | 1.00              | 1.27 (1.13-1.44)             | 1.05 (0.91-1.20)       | 1.30 (1.16-1.44)           | 1.46 (1.23-1.74) | 1.61 (1.39-1.87)  | 1.41 (1.21-1.64) | 2.10 (1.88-2.36) |
| Adjusted for age and gender                                              | 1.00              | 1.26 (1.11-1.42)             | 1.02 (0.89-1.17)       | 1.27 (1.14-1.42)           | 1.42 (1.20-1.69) | 1.56 (1.35-1.81)  | 1.40 (1.20-1.64) | 2.05 (1.83-2.19) |
| + race, income, state of residence, insurance status and comorbidities*  | 1.00              | 1.19 (1.05-1.35)             | 1.00 (0.87-1.15)       | 1.20 (1.07-1.33)           | 1.39 (1.17-1.65) | 1.39 (1.20-1.61)  | 1.29 (1.11-1.52) | 1.74 (1.55-1.96) |
| + frailty†                                                               | 1.00              | 1.18 (1.04-1.34)             | 1.01 (0.88-1.16)       | 1.21 (1.08-1.35)           | 1.38 (1.16-1.65) | 1.37 (1.19-1.59)  | 1.30 (1.11-1.52) | 1.73 (1.54-1.95) |
| <b>Patients with dementia (n=8666)</b>                                   | (n=3155)          | (n=575)                      | (n=606)                | (n=910)                    | (n=329)          | (n=395)           | (n=370)          | (n=773)          |
| Unadjusted                                                               | 1.00              | 1.37 (1.14-1.65)             | 0.85 (0.69-1.06)       | 1.28 (1.10-1.50)           | 1.16 (0.90-1.49) | 1.63 (1.33-2.00)  | 1.28 (1.02-1.61) | 1.49 (1.27-1.75) |
| Adjusted for age and gender                                              | 1.00              | 1.33 (1.11-1.60)             | 0.88 (0.71-1.09)       | 1.25 (1.07-1.46)           | 1.19 (0.93-1.54) | 1.61 (1.32-1.97)  | 1.28 (1.02-1.61) | 1.49 (1.27-1.75) |
| + race, income, state or residence, insurance status, and comorbidities* | 1.00              | 1.30 (1.08-1.57)             | 0.90 (0.72-1.12)       | 1.25 (1.06-1.47)           | 1.23 (0.95-1.59) | 1.59 (1.29-1.96)  | 1.25 (0.99-1.58) | 1.53 (1.29-1.81) |
| + frailty†                                                               | 1.00              | 1.29 (1.07-1.56)             | 0.90 (0.72-1.12)       | 1.25 (1.06-1.47)           | 1.21 (0.93-1.57) | 1.58 (1.28-1.95)  | 1.23 (0.97-1.55) | 1.50 (1.26-1.78) |
| <b>Patients w/o dementia (n=82,980)</b>                                  | (n=40,458)        | (n=7639)                     | (n=6575)               | (n=11 420)                 | (n=3040)         | (n=4150)          | (n=3902)         | (n=5796)         |
| Unadjusted                                                               | 1.00              | 1.16 (1.08-1.26)             | 1.03 (0.94-1.12)       | 1.31 (1.23-1.40)           | 1.23 (1.09-1.39) | 1.47 (1.34-1.62)  | 1.36 (1.23-1.50) | 1.88 (1.76-2.03) |
| Adjusted for age and gender                                              | 1.00              | 1.16 (1.07-1.25)             | 1.01 (0.92-1.10)       | 1.28 (1.20-1.37)           | 1.22 (1.09-1.37) | 1.44 (1.31-1.58)  | 1.35 (1.22-1.49) | 1.86 (1.76-2.00) |
| + race, income, state of residence, insurance status, and comorbidities* | 1.00              | 1.09 (1.01-1.18)             | 0.99 (0.90-1.08)       | 1.17 (1.09-1.25)           | 1.19 (1.06-1.34) | 1.29 (1.17-1.42)  | 1.27 (1.15-1.40) | 1.68 (1.56-1.81) |
| + frailty†                                                               | 1.00              | 1.09 (1.01-1.18)             | 0.99 (0.91-1.08)       | 1.17 (1.10-1.25)           | 1.19 (1.06-1.34) | 1.29 (1.18-1.42)  | 1.29 (1.16-1.42) | 1.67 (1.55-1.80) |
| <b>Patients with diabetes (n=36,337)</b>                                 | (n=17,600)        | (n=3369)                     | (n=2881)               | (n=5000)                   | (n=1393)         | (n=1913)          | (n=1633)         | (n=2548)         |
| Unadjusted                                                               | 1.00              | 1.14 (1.23-1.27)             | 0.96 (0.85-1.08)       | 1.34 (1.23-1.45)           | 1.14 (0.98-1.33) | 1.59 (1.41-1.78)  | 1.23 (1.07-1.41) | 1.69 (1.53-1.87) |
| Adjusted for age and gender                                              | 1.00              | 1.15 (1.03-1.27)             | 0.95 (0.83-1.05)       | 1.31 (1.20-1.42)           | 1.14 (0.98-1.33) | 1.61 (1.44-1.81)  | 1.21 (1.05-1.39) | 1.70 (1.54-1.88) |
| + race, income, state of residence insurance status, and comorbidities*  | 1.00              | 1.11 (1.00-1.24)             | 0.92 (0.82-1.04)       | 1.20 (1.10-1.31)           | 1.15 (0.98-1.34) | 1.44 (1.28-1.62)  | 1.12 (0.97-1.29) | 1.56 (1.41-1.73) |
| + frailty†                                                               | 1.00              | 1.13 (1.00-1.24)             | 0.92 (0.82-1.04)       | 1.20 (1.10-1.31)           | 1.14 (0.97-1.33) | 1.44 (1.28-1.62)  | 1.12 (0.98-1.29) | 1.55 (1.40-1.72) |
| <b>Patients without diabetes (n=54,532)</b>                              | (n=26,451)        | (n=4900)                     | (n=4361)               | (n=7401)                   | (n=2003)         | (n=2646)          | (n=2671)         | (n=4099)         |
| Unadjusted                                                               | 1.00              | 1.24 (1.12-1.37)             | 1.07 (0.96-1.21)       | 1.28 (1.18-1.40)           | 1.36 (1.18-1.57) | 1.43 (1.26-1.62)  | 1.52 (1.35-1.75) | 2.10 (1.92-2.30) |
| Adjusted for age and gender                                              | 1.00              | 1.21 (1.09-1.34)             | 1.06 (0.95-1.18)       | 1.24 (1.14-1.35)           | 1.32 (1.14-1.53) | 1.33 (1.17-1.51)  | 1.51 (1.34-1.70) | 2.00 (1.83-2.18) |
| + race, income, state of residence, insurance status, and comorbidities* | 1.00              | 1.14 (1.03-1.27)             | 1.05 (0.93-1.17)       | 1.14 (1.05-1.25)           | 1.24 (1.07-1.33) | 1.19 (1.05-1.35)  | 1.38 (1.22-1.56) | 1.73 (1.58-1.90) |
| + frailty†                                                               | 1.00              | 1.14 (1.03-1.26)             | 1.05 (0.94-1.18)       | 1.14 (1.05-1.25)           | 1.24 (1.07-1.43) | 1.18 (1.04-1.34)  | 1.38 (1.22-1.56) | 1.71 (1.56-1.88) |

Continued

Online Table 2. Continued

|                                                                          | All three classes | ACEI/ARB + beta-blocker only | ACEI/ARB + statin only | Beta-blocker + statin only | ACEI/ARB only    | Beta-blocker only | Statin only      | None             |
|--------------------------------------------------------------------------|-------------------|------------------------------|------------------------|----------------------------|------------------|-------------------|------------------|------------------|
| <b>Patients aged 65-74 (n=39,572)</b>                                    | (n=19,661)        | (n=3582)                     | (n=3078)               | (n=5105)                   | (n=1464)         | (n=1907)          | (n=1870)         | (n=2905)         |
| Unadjusted                                                               | 1.00              | 1.19 (1.04-1.37)             | 0.98 (0.83-1.14)       | 1.37 (1.22-1.53)           | 1.2 (0.98-1.46)  | 1.57 (1.34-1.84)  | 1.26 (1.06-1.51) | 2.07 (1.83-2.33) |
| Adjusted for sex                                                         | 1.00              | 1.19 (1.04-1.37)             | 0.98 (0.83-1.14)       | 1.37 (1.22-1.53)           | 1.19 (0.98-1.46) | 1.57 (1.34-1.84)  | 1.26 (1.06-1.51) | 2.07 (1.83-2.33) |
| + race, income, state of residence, insurance status, and comorbidities* | 1.00              |                              |                        |                            |                  |                   |                  |                  |
| + frailty†                                                               | 1.00              | 1.13 (0.99-1.30)             | 0.94 (0.80-1.10)       | 1.25 (1.11-1.4)            | 1.10 (0.90-1.35) | 1.35 (1.15-1.58)  | 1.22 (1.02-1.46) | 1.71 (1.51-1.93) |
| <b>Patients aged 75-84 (n=36,093)</b>                                    | (n=17,279)        | (n=3313)                     | (n=2907)               | (n=5120)                   | (n=1348)         | (n=1838)          | (n=1738)         | (n=2550)         |
| Unadjusted                                                               | 1.00              | 1.19 (1.06-1.33)             | 1.04 (0.92-1.18)       | 1.29 (1.17-1.41)           | 1.5 (1.28-1.75)  | 1.55 (1.36-1.77)  | 1.43 (1.24-1.64) | 1.8 (1.62-2.01)  |
| Adjusted for sex                                                         | 1.00              | 1.20 (1.07-1.34)             | 1.04 (0.91-1.18)       | 1.28 (1.17-1.41)           | 1.5 (1.29-1.75)  | 1.55 (1.36-1.77)  | 1.42 (1.23-1.63) | 1.8 (1.61-2.00)  |
| + race, income, state of residence, insurance status, and comorbidities* | 1.00              |                              |                        |                            |                  |                   |                  |                  |
| + frailty†                                                               | 1.00              | 1.13 (1.01-1.27)             | 1.00 (0.88-1.13)       | 1.19 (1.08-1.31)           | 1.48 (1.27-1.72) | 1.37 (1.2-1.56)   | 1.29 (1.12-1.48) | 1.61 (1.44-1.81) |
| <b>Patients aged 85+ (n=15,204)</b>                                      | (n=7111)          | (n=1374)                     | (n=1257)               | (n=2176)                   | (n=584)          | (n=814)           | (n=696)          | (n=1192)         |
| Unadjusted                                                               | 1.00              | 1.16 (1.02-1.32)             | 0.97 (0.83-1.12)       | 1.20 (1.07-1.33)           | 0.96 (0.78-1.19) | 1.33 (1.14-1.56)  | 1.38 (1.17-1.62) | 1.77 (1.57-2.00) |
| Adjusted for sex                                                         | 1.00              | 1.17 (1.02-1.33)             | 0.96 (0.83-1.12)       | 1.19 (1.07-1.33)           | 0.97 (0.79-1.19) | 1.33 (1.14-1.55)  | 1.35 (1.15-1.59) | 1.76 (1.56-1.99) |
| + race, income, state of residence, insurance status, and comorbidities* | 1.00              |                              |                        |                            |                  |                   |                  |                  |
| + frailty†                                                               | 1.00              | 1.12 (0.98-1.28)             | 0.98 (0.85-1.14)       | 1.11 (0.99-1.24)           | 0.94 (0.76-1.16) | 1.23 (1.05-1.44)  | 1.27 (1.07-1.49) | 1.64 (1.45-1.86) |
| <b>Female patients (n=49,777)</b>                                        | (n=24,046)        | (n=4889)                     | (n=3950)               | (n=6710)                   | (n=1989)         | (n=2598)          | (n=2089)         | (n=3506)         |
| Unadjusted                                                               | 1.00              | 1.13 (1.03-1.24)             | 1.01 (0.91-1.13)       | 1.25 (1.15-1.35)           | 1.22 (1.07-1.40) | 1.33 (1.18-1.49)  | 1.31 (1.15-1.49) | 1.85 (1.69-2.03) |
| Adjusted for age                                                         | 1.00              | 1.13 (1.03-1.24)             | 0.99 (0.89-1.11)       | 1.23 (1.14-1.34)           | 1.21 (1.06-1.39) | 1.31 (1.17-1.47)  | 1.31 (1.15-1.49) | 1.81 (1.65-1.98) |
| + race, income, state of residence, insurance status, and comorbidities* | 1.00              |                              |                        |                            |                  |                   |                  |                  |
| + frailty†                                                               | 1.00              | 1.09 (0.99-1.20)             | 0.97 (0.87-1.08)       | 1.13 (1.05-1.23)           | 1.15 (1.00-1.32) | 1.18 (1.05-1.33)  | 1.24 (1.09-1.42) | 1.61 (1.46-1.76) |
| <b>Male patients (n=41,092)</b>                                          | (n=20,005)        | (n=3380)                     | (n=3292)               | (n=5691)                   | (n=1407)         | (n=1961)          | (n=2215)         | (n=3141)         |
| Unadjusted                                                               | 1.00              | 1.27 (1.14-1.43)             | 1.03 (0.91-1.16)       | 1.40 (1.28-1.53)           | 1.29 (1.09-1.53) | 1.81 (1.60-2.05)  | 1.46 (1.29-1.66) | 1.95 (1.77-2.16) |
| Adjusted for age                                                         | 1.00              | 1.25 (1.11-1.4)              | 1.01 (0.89-1.14)       | 1.33 (1.22-1.45)           | 1.27 (1.08-1.50) | 1.71 (1.51-1.93)  | 1.4 (1.23-1.59)  | 1.89 (1.71-2.09) |
| + race, income, state of residence, insurance status, and comorbidities* | 1.00              |                              |                        |                            |                  |                   |                  |                  |
| + frailty†                                                               | 1.00              | 1.18 (1.05-1.32)             | 1.00 (0.88-1.13)       | 1.22 (1.11-1.34)           | 1.29 (1.09-1.53) | 1.51 (1.33-1.72)  | 1.27 (1.11-1.44) | 1.73 (1.56-1.92) |

\*Acute myocardial infarction (AMI), coronary artery bypass graft surgery (CABG), percutaneous coronary intervention (PCI), stroke/transient ischemic attack, unstable angina, angina pectoris, ischemic heart disease, heart failure, atrial fibrillation, peripheral vascular disease, hypertension, hyperlipidemia; chronic kidney disease, liver disease, chronic obstructive pulmonary disease, asthma, depression, dementia/Alzheimer's Disease, dispensations for ACEIs/ARBs, beta-blockers, and statins within 180 days within prior to the index AMI hospitalization and, during the hospitalization, AMI type (non-ST elevation vs. ST elevation myocardial infarction), revascularization procedures (CABG, PCI, cardiac catheterization, infusion of thrombolytic and/or platelet inhibitors) and complications (heart failure, cardiogenic shock, acute renal failure, hypotension, cardiac dysrhythmias) and total intensive care unit and inpatient days.

† Additional variables suggestive of frailty proxy including ambulance transport, coagulation deficiency, decubitus ulcer, falls/difficulty walking, obesity, bladder dysfunction, infection/sepsis, lipid abnormality, podiatric care, neurological disorder, osteoarthritis, paralysis, Parkinson's Disease, pulmonary circulation disorder, rehabilitation services, screening tests, vertigo, weakness, wheelchair, weight loss



Online Table 3. Sensitivity analysis by additionally controlling for polypharmacy and dose of medications

| <b>Adherence Groups</b>      | <b>Main Finding</b> | <b>Sensitivity Analysis</b> |
|------------------------------|---------------------|-----------------------------|
|                              | HR (95% CI)         |                             |
| ACEI/ARB+beta-blocker+statin | Ref                 | Ref                         |
| ACEI/ARB+beta-blocker only   | 1.12 (1.04-1.21)    | 1.13 (1.05-1.21)            |
| ACEI/ARB+statin only         | 0.98 (0.91-1.07)    | 0.99 (0.91-1.07)            |
| Beta-blocker+statin only     | 1.17 (1.1-1.25)     | 1.19 (1.12-1.256)           |
| ACEI/ARB only                | 1.19 (1.07-1.32)    | 1.22 (1.09-1.35)            |
| Beta-blocker only            | 1.32 (1.21-1.44)    | 1.34 (1.23-1.46)            |
| Statin only                  | 1.26 (1.15-1.38)    | 1.31 (1.19-1.43)            |
| None                         | 1.65 (1.54-1.76)    | 1.73 (1.61-1.85)            |

Online Table 4. Proportional hazard assumption test (Pearson correlation test of Schoenfeld residuals with time)

| Adherence group            | Pearson Correlation r | P-Value          |
|----------------------------|-----------------------|------------------|
| ACEI/ARB+beta-blocker only | -0.007                | 0.501            |
| ACEI/ARB+statin only       | 0.001                 | 0.948            |
| Beta-blocker+statin only   | -0.007                | 0.484            |
| <b>ACEI/ARB only</b>       | <b>-0.025</b>         | <b>0.014</b>     |
| Beta-blocker only          | -0.014                | 0.152            |
| Statin only                | -0.001                | 0.954            |
| <b>None</b>                | <b>d-0.033</b>        | <b>&lt;.0001</b> |
